## Phylogenetic Analysis of SARS-CoV-2 Genomes in Turkey

**Ogün ADEBALI\***, Aylin BİRCAN, Defne ÇİRCİ, Burak İŞLEK, Zeynep KILINÇ,  
Berkay SELÇUK, Berk TURHAN

Molecular Biology, Genetics and Bioengineering, Faculty of Natural Sciences and  
Engineering, Sabancı University, İstanbul, Turkey

**\*Correspondence:** [oadebali@sabanciuniv.edu](mailto:oadebali@sabanciuniv.edu)

ORCIDs:

Ogun Adebali: <https://orcid.org/0000-0001-9213-4070>

Aylin Bircan: <https://orcid.org/0000-0001-6663-6173>

Defne Çirci: <https://orcid.org/0000-0002-5761-0198>

Burak İşlek: <https://orcid.org/0000-0003-2700-9884>

Zeynep Kılınç: <https://orcid.org/0000-0002-1906-0391>

Berkay Selçuk: <https://orcid.org/0000-0003-3206-4749>

Berk Turhan: <https://orcid.org/0000-0002-6471-0357>

## 1                                    **Phylogenetic Analysis of SARS-CoV-2 Genomes in Turkey**

2

3    **Abstract:** COVID-19 has effectively spread worldwide. As of May 2020, Turkey is  
4 among the top ten countries with the most cases. A comprehensive genomic  
5 characterization of the virus isolates in Turkey is yet to be carried out. Here, we built a  
6 phylogenetic tree with 15,277 severe acute respiratory syndrome coronavirus 2 (SARS-  
7 CoV-2) genomes. We identified the subtypes based on the phylogenetic clustering in  
8 comparison with the previously annotated classifications. We performed a phylogenetic  
9 analysis of the first thirty SARS-CoV-2 genomes isolated and sequenced in Turkey. Our  
10 results suggest that the first introduction of the virus to the country is earlier than the first  
11 reported case of infection. Virus genomes isolated from Turkey are dispersed among most  
12 types in the phylogenetic tree. Two of the seventeen sub-clusters were found enriched  
13 with the isolates of Turkey, which likely have spread expansively in the country. Finally,  
14 we traced virus genomes based on their phylogenetic placements. This analysis suggested  
15 multiple independent international introductions of the virus and revealed a hub for the  
16 inland transmission. We released a web application to track the global and interprovincial  
17 virus spread of the isolates from Turkey in comparison to thousands of genomes  
18 worldwide.

19

20    **Keywords:** SARS-CoV-2, COVID-19, phylogenetics, evolution, genome sequence

## 21 1. Introduction

22 Severe acute respiratory syndrome coronavirus 2 (SARS-CoV-2) has emerged in Wuhan  
23 (Li, et al. 2020) and spread across continents and eventually resulted in the COVID-19  
24 pandemic. Although there are significant differences between the current and ancestral  
25 SARS-CoV genome, the reason behind its pandemic behaviour is still unclear. Genome  
26 sequences around the world were revealed and deposited into public databases such as  
27 GISAID (Shu and McCauley 2017). It is crucial to reveal the evolutionary events of  
28 SARS-CoV-2 to understand the types of the circulating genomes as well as in which parts  
29 of the genome differ across these types.

30

31 The SARS-CoV-2 virus originated from SARS-CoV, and the intermediate versions  
32 between two human viruses were found in bats and pangolins (Li, et al. 2020). The virus  
33 has been under a strong purifying selection (Li, et al. 2020). With the genomes obtained  
34 so far, the sequences of SARS-CoV-2 genomes showed more than 99.9% percent identity  
35 suggesting a recent shift to the human species (Tang, et al. 2020). Still, there are clear  
36 evolutionary clusters in the genome pool. Various studies use different methods such as  
37 SNP based (Tang, et al. 2020) or entropy (Zhao, et al. 2020) based to identify evolving  
38 virus strains to reveal genomic regions responsible for transmission and evolution of the  
39 virus. Tang et. al identified S and L strains among 103 SARS-CoV-2 genomes based on  
40 two SNPs at ORF1ab and ORF8 regions which encode replicase/transcriptase and ATF6,  
41 respectively (Tang, et al. 2020). Entropy-based approach generated informative subtype  
42 markers from 17 informative positions to cluster evolving virus genomes (Zhao, et al.  
43 2020). Another study defined a competitive subtype based on D614G mutation at spike

44 protein which is facilitates binding to ACE2 to receptor on the host cell surface  
45 (Bhattacharyya, et al. 2020).

46

47 In this work, we used publicly available SARS-CoV-2 genome datasets. We aligned the  
48 whole genome sequences of more than 15,000 genomes and built a phylogenetic tree with  
49 the maximum likelihood method. We clustered the genomes based on their clade  
50 distribution in the phylogenetic tree. The genome characteristics are identified and  
51 associated with the previous studies. We further analysed clusters, mutation and  
52 transmission patterns of the genomes from Turkey.

53

## 54 **2. Materials and methods**

55 To perform our analyses we retrieved virus genomes, aligned them to each other and  
56 revealed the evolutionary relationships between them through phylogenetic trees. We  
57 assigned the clusters based on the mutations for each genome. We further analyzed the  
58 phylogenetic tree with respect to neighbor samples of our genomes of interest to identify  
59 possibly transmission patterns.

### 60 **2.1. Data retrieval, multiple sequence alignment and phylogenomic tree 61 generation**

62 The entire SARS-CoV-2 genome sequences, along with their metadata were retrieved  
63 from the GISAID database (**Table-S1**) (Shu and McCauley 2017). We retrieved the  
64 initial batch of genomes (3,228) from GISAID on 02/04/2020. We used Augur toolkit to  
65 align whole genome sequences using mafft algorithm (--reorder --anysymbol --  
66 nomemsave). The SARS-CoV2 isolate Wuhan-Hu-1 genome (GenBank:NC\_045512.2)  
67 is used as a reference genome to trim the sequence and remove insertions in the

68 genomes. Since the initial batch, the new sequences in GISAID were periodically added  
69 to the pre-existing multiple sequence alignment (--existing-alignment). The final  
70 multiple sequence alignment (MSA) contained 15,501 genomes that were available on  
71 May 1<sup>st</sup> 2020. In the metadata file, some genomes lacked month and day information  
72 and only had the year of the sample collection date. The genomes with incomplete  
73 information were filtered out and the unfiltered MSA consisted of 15,277 sequences.  
74 Maximum likelihood phylogenetic tree was built with IQ-TREE with the following  
75 options: -nt AUTO (on a 112-core server) -m GTR -fast. Augur was used to estimate the  
76 molecular clock through TimeTree (Sagulenko, et al. 2018). For Figure 2, IQ-TREE  
77 multicore version 1.6.1 was used for the construction of the maximum likelihood tree.  
78 Ultra-fast bootstrapping option is used with 1000 bootstraps for the transition genome  
79 tree.

80

81 The sub-tree consisting of Turkey isolates were retrieved from the master time-resolved  
82 tree with the 'Pruning' method from ete3 toolkit (Huerta-Cepas, et al. 2016). The tree is  
83 visualized in FigTree v1.4.4 (<http://tree.bio.ed.ac.uk/software/figtree/>), and rerooted by  
84 selecting EPI\_ISL\_428718 as an outgroup. The branch lengths of EPI-ISL-417413 and  
85 EPI-ISL-428713 samples are shortened for better visualization. ggtree (Yu, et al. 2017)  
86 package in R was used to generate the tree and corresponding clusters.

87

## 88 **2.2. Genome clustering**

89 We generated phylo-clusters with TreeCluster (Balaban, et al. 2019) which is  
90 specifically designed to group viral genomes. The tool supports different clustering

91 options and we used the default option which is called as “Max Clade”. Max Clade  
92 finds clusters based on two parameters. The first one is the “-t” option, which defines  
93 the threshold that two leaf nodes can be distant from each other. The second option “-s”  
94 is used to assign a minimum support value that connects two leaf nodes or clades. For  
95 our analysis, we only used the distance threshold. Max Clade algorithm requires leaves  
96 to form a clade and satisfy the distance threshold at the same time.

97 We tried different thresholds until the convergence to the clusters that we obtained. We  
98 decided on the number of phylo-clusters and phylo-subgroups based on their similarity  
99 with different clusters that are previously reported (see below). We used -t parameter as  
100 0.0084 and 0.00463 for phylo-clusters and phylo-subclusters, respectively. After  
101 retrieving the groupings from TreeCluster, we eliminated clusters containing less than  
102 100 sequences (except one sub-cluster that contains 99 sequences). We classified those  
103 clusters having less than 100 sequences as not clustered. As a result, we obtained four  
104 primary and 17 sub-clusters.

105

106 L/S clustering was performed by considering the nucleotides at 8782<sup>nd</sup> and 28144<sup>th</sup>  
107 positions. In case nucleotides in these positions forms “TC” haplotype, the sequence is  
108 categorized as S type. Sequences whose nucleotide combination at the specified  
109 positions is “CT” , categorized as L type .In case both these positions correspond to a  
110 gap, the sequence is classified as N type. All other cases are categorized as unknown  
111 type. 614 G/D clustering applied based on the amino acid at the 614<sup>th</sup> position of the  
112 spike protein (Jaimes, et al. 2020). Combinations of the nucleotides at positions  
113 241;1059; 3037; 8782; 11083; 14408; 14805; 17747; 17858; 18060; 23403; 25563;  
114 26144; 28144; 28881; 28882; 28883 determined the subtypes for barcode clustering.

115 Sequences that belong to the ten major subtypes (with more than 100 sequences) which  
116 constitute %86 percent of all sequences were labelled with their respective 17  
117 nucleotide combination (Zhao, et al. 2020). All other sequences were classified as  
118 unknown for barcode classification. Six major clusters (Morais Júnior, et al. 2020) were  
119 assigned by the previously determined twelve positions (3037; 8782; 11083; 14408;  
120 17747; 17858; 18060; 23403; 28144; 28881; 28882; 28883). Nucleotide combinations  
121 in these positions formed six major subtypes; the rest was categorized as unknown. The  
122 lineages were assigned using the proposed nomenclature by Rabaut et al. through  
123 Pangolin COVID-19 Lineage Assigner web server (Rambaut, et al. 2020).

124

### 125 **2.3. Distance calculations**

126 We rooted the maximum-likelihood tree for distance calculations by selecting samples  
127 that belong to bats and pangolin as an outgroup, namely EPI-ISL-412976, EPI-ISL-  
128 412977, and EPI-ISL-412860. We measured the distance from leaf to root for every leaf  
129 node that is present in the phylogenetic tree with the ete3 toolkit (Huerta-Cepas, et al.  
130 2016).

131

### 132 **2.4. Variant information processing**

133 Mutations for each position in the multiple sequence alignment, were mapped into a  
134 table relative to the reference genome (GenBank:NC\_045512.2) with a custom script. A  
135 table of all the mutations of only selected sequences was created and ordered according  
136 to the phylogenetic tree of the selected sequences. Mutations that do not correspond to a  
137 nucleotide such as a gap or N were labeled as “Gap or N”; the other mutations were  
138 marked as Nongap. For variations that do not correspond to gap or N, respective

139 nucleotides in the reference genome were taken and added to the table to retrieve the  
140 associated substitution information. The GFF file of the reference genome  
141 (GCF\_009858895.2) was extracted from NCBI's Genome database (NCBI). Open  
142 reading frame (ORF) information of each mutation was retrieved through the GFF file  
143 and added to the table. Positions that are not in the range of any ORF were labelled as  
144 "Non-coding region". Codon information and position of each mutation in the reference  
145 genome were retrieved according to their respective ORF start positions and frame. In  
146 this process, reported frameshifts in ORF1ab and ORF7a and 7b were taken into  
147 account. Coding information was used to assign amino acid substitution information to  
148 the variations. Amino acid substitution information was used to categorize variants as  
149 non-synonymous, synonymous, non-coding regions.

150

## 151 **2.5. Migration analysis**

152 The maximum-likelihood phylodynamic analysis was performed with Treetime  
153 (Sagulenko, et al. 2018) to estimate likely times of whole-genome sequences of SARS-  
154 CoV-2 by computing confidence intervals of node dates and reconstruct phylogenetic  
155 tree into the time-resolved tree. The slope of the root-to-tip regression was set to 0.0008  
156 to avoid inaccurate inferences of substitution rates. With this model, we eliminated the  
157 variation of rapid changes in clock rates by integration along branches (standard  
158 deviation of the fixed clock rate estimate was set to 0.0004). The coalescent likelihood  
159 was performed with the Skyline (Strimmer and Pybus 2001) model to optimize branch  
160 lengths and dates of ancestral nodes and infer the evolutionary history of population  
161 size. The marginal maximum likelihood assignment was used to assign internal nodes to  
162 their most likely dates. Clock rates were filtered by removing tips that deviate more than



163 four interquartile ranges from the root-to-tip versus time regression. JC69 model was  
164 used as General time-reversible (GTR) substitution models to calculate transition  
165 probability matrix, actual substitution rate matrix, and equilibrium frequencies of given  
166 attributes of sequences. The distribution of subleading migration states and entropies  
167 were recorded for each location through Augur trait module (sampling bias correction  
168 was set to 2.5). Closest child-parent pairs that do not go beyond their given locations  
169 were identified and evaluated as transmissions using Auspice (Hadfield, et al. 2018).

170

### 171 **3. Results**

#### 172 **3.1. Phylogenetic map of the virus subtypes**

173 The first COVID-19 case in Turkey was reported on March 10<sup>th</sup>, 2020, later than the  
174 reported first incidents in Asian and European countries. Since then, the number of  
175 cases increased massively. We used all the genomes available in the GISAID database  
176 as of May 1<sup>st</sup>, 2020 and built a phylogenetic tree. After we filtered out the samples with  
177 a lack of information, the total number of samples we eventually used was 15,277. The  
178 phylogenetic tree was built with the maximum likelihood method and a time-resolved  
179 tree was generated (**Figure 1**). To verify the accuracy of the phylogenetic tree as well as  
180 to assess the distribution of well-characterized genomic features, we mapped several  
181 classification schemes on the tree; (i) S/L strain type(Tang, et al. 2020); (ii) D614G  
182 type(Bhattacharyya, et al. 2020); (iii) barcodes(Zhao, et al. 2020); (iv) six major  
183 clusters. Although the methodologies of the clustering attempts were different between  
184 these studies, in general, the previously established groups were in line with our  
185 phylogenetic tree. Besides the already established clustering methods, we classified the  
186 clades based on the phylogenetic tree only. There are two levels of clustering, as we

187 termed phylo-clusters and phylo-subclusters. Small clusters were not taken into account  
188 (see Methods). The phylogenetic map of the virus genomes clearly shows the two major  
189 S and L strain clades. As the ancestral clade, S-strain is seen as limited in the number of  
190 genomes. 29 of the 30 isolates in Turkey are classified in the L-type group.

191

192 The samples from Turkey are dispersed throughout the phylogenetic tree (**Figure 1**). The  
193 30 samples are classified in 3 out of 4 different phylo-clusters and one is remained  
194 unclassified. This dispersion suggest multiple independent introductions to the country.  
195 7 of the 30 genomes have aspartic acid (D) at the 614<sup>th</sup> position of the Spike protein. The  
196 rest 23 genomes have glycine (G) in the same position. Although it was claimed that  
197 D614G mutation is becoming dominant because it enables smoother transmission of the  
198 virus (Bhattacharyya, et al. 2020) this correlation might simply be the founder effect  
199 which is basically the loss or gain of a genetic information when large population arise  
200 from a single individual.

201

### 202 **3.2. A transient genome between S and L strain suggests early introduction**

203 One of the genomes isolated in Turkey (EPI-ISL-428718) clustered together with the  
204 early subtypes of the virus. This genome contains T at the position 8782, which is a  
205 characteristic of the S-strain; however, it has T at the position 28144, which implies the  
206 L-strain. Therefore, this sample is characterized as neither S-strain nor L-strain by their  
207 footprints. In the phylogenetic tree, this genome is placed between S and L strains,  
208 which suggests a transitioning genome from S to L strain (**Figure 2**). The number of  
209 variant nucleotides between this sample and root is lower than the other Turkey  
210 samples. Phylogenetic placement in the earliest cluster, which is closer to the root,

211 suggests that the lineage of EPI-ISL-428718 entered Turkey as one of the first genomes.  
212 By the time this sample was isolated in Turkey, the L-strain had started to spread in  
213 Europe, primarily in Italy. Although the isolation date of this early sample is one week  
214 later than the first reported case, the existence of an ancestral genome sequence suggests  
215 an earlier introduction of SARS-CoV-2 to Turkey.

216

### 217 **3.3. Cluster profiles of the samples**

218 Turkey has genome samples from at least three of the four major clusters. By taking the  
219 transitioning genome into account, samples of Turkey are genuinely scattered in the  
220 phylogenetic tree. Based on the groupings applied, we analyzed the distribution of the  
221 clusters in Turkey and other countries (**Figure 3A**). The most samples of Turkey belong  
222 to cluster 3. Iran, Denmark and France are also enriched in cluster 3. Unlike China,  
223 South Korea, Spain and the USA, cluster 1 (S-strain) sample has not been observed in  
224 Turkey yet. Most European countries are enriched in cluster 3. Although Turkey has  
225 cluster 3 genomes, the fraction of them is lower compared to those countries. With the  
226 available genome sequences, the overall cluster profile of Turkey seems to be unique.  
227 The divergence of the samples from to tree root was calculated for each sub-cluster. The  
228 sub-clusters observed in Turkey were analyzed only along with the other countries  
229 (**Figure 3B**). The divergence rates are comparable in general. However, within the same  
230 sub-clusters, virus genomes collected in Turkey have averagely more diverged than  
231 their relatives in other countries. The isolated genomes assigned to sub-cluster 4 and 8  
232 show higher divergence rates in Turkey compared to the others in the same cluster (p-  
233 value: 0.00001 and 0.006, respectively). This observation possibly suggests either or  
234 both of the two scenarios; (i) the viruses dominantly circulating in Turkey were

235 introduced to the country later than other countries or (ii) this sub-cluster has been  
236 circulating in Turkey at a relatively higher rate than other countries and diverged more.

237

### 238 **3.4. Mutation analysis of the genomes retrieved in Turkey**

239 We used 30 Turkey isolates to analyze their mutational patterns and corresponding  
240 clusters further. From the master tree, we pruned all the leaves except for the samples of  
241 interest. We rooted the subtree at the transition sample. We aligned the assigned clusters  
242 and all the mutations relative to the reference genome (**Figure 4**), illustrating a  
243 correlation between the mutation pattern and the phylogenetic tree clades. Observation  
244 of no recurrence of a mutation suggests many mutations have resulted in a founder  
245 effect in the analyzed samples.

246

247 In total, 55 unique mutations were detected, 2 and 20 of which are non-coding and  
248 synonymous. Thirty-three unique amino acid substitutions are detected (Table 2).  
249 D614G mutation is claimed to be more aggressive because of its easier transmission. A  
250 recent report also showed that viruses with 614G genotype results in higher fatality rates  
251 (Becerra-Flores and Cardozo 2020). 23 out of 30 genomes we analyzed have 614G  
252 mutation. D614G mutation seems to have mutated with the two synonymous mutations  
253 in ORF1ab (**Figure 4**). Besides 614G, three more amino acid substitutions were  
254 identified in the spike protein (**Table 2**). G206A, T951I, G227S, S911F, A1420V,  
255 A3995F mutations in ORF1a and V772I, T1238I mutations in Spike protein, V66L in  
256 ORF5 and S54L in ORF8 are found specific to some isolates in Turkey (**Table 2**). The  
257 most abundant amino acid substitutions (23/30) are P314L (ORF1b) and D614G  
258 (Spike), which are not enriched in Turkey and dispersed worldwide. ORF1a V378I and

259 ORF9 S194L are found in 7 and 6 of the 30 isolates, respectively, and show high  
260 fraction (15 folds with respect to general) in Turkey.

261

262 The mutational landscape represents the natural classifications of major and sub-  
263 clusters. These mutational footprints can be used to identify the clusters of the future  
264 genomes.

265

### 266 **3.5. Trace of the spread**

267 Based on the number of mutations we observe since December 2019, SARS-CoV-2  
268 genome mutates twice a month, on average. As genome sequencing reveals mutations, it  
269 enables a better understanding of the epidemiology by identifying patterns of virus  
270 transmission. The time-resolved phylogenetic distributions of the genomes collected in  
271 Turkey suggested at least three sources of introduction (**Figure 5A**). The earliest  
272 introduction seems to be originated from the US. The second international movement  
273 observed was from Australia. The third and latest introduction of the virus is from  
274 Europe, mostly based in the UK. There is a connection between Saudi Arabia and the  
275 two cities in Turkey. Based on the model, this association is reciprocal. The Europe-  
276 based introductions are seen as the genomes isolated in Istanbul. Within Turkey, the  
277 transmission hub appears to be Ankara (**Figure 5B**). The isolates in 5 cities are  
278 associated with a virus isolated in Ankara (**Figure 5C**).

279

### 280 **3.6. Web application to trace virus transmission**

281 We have published a web application powered by Auspice  
282 ([sarscov2.adebalilab.org/latest](https://sarscov2.adebalilab.org/latest)). We employed the front-end package (Auspice) that

283 Nextstrain uses (Hadfield, et al. 2018). With increasing number of virus strains, not far  
284 from now, it will be infeasible to display the entire phylogenetic tree even in modern  
285 browsers. Nextstrain handles this problem by grouping the datasets based on the  
286 continents. As the aim of this platform is to trace the spread of virus genomes associated  
287 with Turkey, we will use representatives in the phylogenetic tree. The representative  
288 sequences will cover all the subtypes. The genomes of the samples collected in Turkey  
289 and their nearby sequences will be kept. With this approach, the web application will  
290 always contain the genome data from Turkey and necessary information of the subtypes  
291 with the representative sequences. An additional dimension we added to the application  
292 is that it enables to trace virus across the cities of Turkey. This approach is applicable to  
293 create a comprehensive platform for migration analysis for any country or region of  
294 choice.

295

#### 296 **4. Discussion**

297 There are two most abundant lineages of isolates in Turkey: sub-clusters 4 and 8. If the  
298 30 samples unbiasedly represent the overall distribution of the strains in Turkey, sub-  
299 clusters 4 and 8 might comprise approximately 80% of the genomes in the country. More  
300 genomes should be sequenced and analyzed to gain more insight into virus evolution. It  
301 is essential to continuously follow up on the upcoming mutations when new samples are  
302 added to GISAID database.

303

304 The phylogenetic analysis of the circulating genomes in a country is necessary to identify  
305 the specific groups and their unique mutational patterns. The success of the COVID-19  
306 diagnosis test kits, antibody tests and protein-targeting drugs possibly depend on the

307 variation of the genomes. If a mutation affects protein recognition, the sensitivity of the  
308 test might drastically reduce. Therefore, mutation profiles of the isolates abundantly  
309 circulating in the country should be taken into account towards these aims. As  
310 international travels are limited, the genome profiles of the countries differ from each  
311 other. If international transmissions are kept being restricted, distinct cluster profiles  
312 might establish. Therefore, each country might need to develop their specific tests  
313 targeting the abundant genomes circulating in local.

314

315 The spread of the virus is traced by the personal declarations and travel history of the  
316 infected people. As SARS-CoV-2 genomes spread, they leave foot prints behind  
317 (mutations) allowing us to trace them. It is feasible to complement the conventional  
318 approach with genome sequencing in an unbiased way. Implemented feature of city-  
319 based tracing of the virus should be useful for authorities to take necessary measures to  
320 prevent spread. This approach will be automated in a standard pipeline. We aim to  
321 eliminate the technical limitations (because of the size) by applying filtering methods  
322 without losing any relevant information.

323

#### 324 **Acknowledgments**

325 This work, in part, is supported by the European Molecular Biology Organization  
326 (EMBO) Installation Grant (OA) funded by The Scientific and Technological Research  
327 Council of Turkey (TÜBİTAK). OA is additionally supported by International  
328 Fellowship for Outstanding Researchers Program, TÜBİTAK 2232 and BAGEP (Young  
329 Scientist Award by Science Academy, Turkey) 2019 grant. DÇ, ZK and BT are supported  
330 by the TÜBİTAK STAR program 2247-C.

331

332 We would like to thank all the healthcare workers who save lives during the COVID-19  
333 pandemic. We thank the research groups who made the genome datasets available for  
334 accelerating research. So far, three groups in Turkey submitted genome sequences; 26  
335 genomes were provided by the Ministry of Health (Fatma Bayrakdar, Ayşe Başak Altaş,  
336 Yasemin Coşgun, Gülay Korukluoğlu, Selçuk Kılıç); 3 submitted by the GLAB (Ilker  
337 Karacan, Tugba Kizilboga Akgun, Bugra Agaoglu, Gizem Alkurt, Jale Yildiz, Betsi  
338 Köse, Elifnaz Çelik, Mehtap Aydın, Levent Doganay, Gizem Dinler); 1 submitted by  
339 Erciyes University (Shaikh Terkis Islam Pavel, Hazel Yetiskin, Gunsu Aydin, Can  
340 Holyavkin, Muhammet Ali Uygut, Zehra B Dursun, İlhami Celik, Alper Iseri, Aykut  
341 Ozdarendeli).

342

343 We thank Dr. Barış Süzek for his helpful comments on the manuscript. We would like to  
344 acknowledge Cem Azgari for his contributions throughout the project. We thank  
345 Molecular Biology Association for their leadership in taking the initiative of forming a  
346 pool of volunteers in COVID-19 testing. Finally, we would like to thank the members of  
347 Ecology and Evolutionary Biology Association in Turkey for fruitful discussions  
348 regarding the preliminary analysis of the SARS-CoV-2 genomes.

349

#### 350 **Authors' contribution**

351 OA conceived the study, designed the analysis, interpreted the results and wrote the first  
352 draft. AB generated the multiple sequence alignments, Bİ generated the visualization  
353 pipeline with auspice. BS generated the clusters based on the phylogenetic tree and  
354 plotted cluster graphs. DÇ, ZK and BT assigned previously identified clusters to the



355 genomes, visualized the clusters aligned with the tree and identified mutations per  
356 sample. All authors contributed to manuscript writing and revising.

357

## 358 **References**

359 Balaban M, Moshiri N, Mai U, Jia X, Mirarab S (2019). TreeCluster: Clustering  
360 biological sequences using phylogenetic trees. PLoS One 14:e0221068

361 Becerra-Flores M, Cardozo T (2020). SARS-CoV-2 viral spike G614 mutation exhibits  
362 higher case fatality rate. Int J Clin Pract

363 Bhattacharyya C, Das C, Ghosh A, Singh AK, Mukherjee S, Majumder PP, Basu A,  
364 Biswas NK (2020). Global Spread of SARS-CoV-2 Subtype with Spike Protein Mutation  
365 D614G is Shaped by Human Genomic Variations that Regulate Expression of  
366 *TMPRSS2* and *MX1* Genes. bioRxiv 2020.2005.2004.075911

367 Hadfield J, Megill C, Bell SM, Huddleston J, Potter B, Callender C, Sagulenko P, Bedford  
368 T, Neher RA (2018). Nextstrain: real-time tracking of pathogen evolution. Bioinformatics  
369 34:4121-4123

370 Huerta-Cepas J, Serra F, Bork P (2016). ETE 3: Reconstruction, Analysis, and  
371 Visualization of Phylogenomic Data. Mol Biol Evol 33:1635-1638

372 Jaimes JA, Andre NM, Chappie JS, Millet JK, Whittaker GR (2020). Phylogenetic  
373 Analysis and Structural Modeling of SARS-CoV-2 Spike Protein Reveals an  
374 Evolutionary Distinct and Proteolytically Sensitive Activation Loop. J Mol Biol

375 Li C, Yang Y, Ren L (2020). Genetic evolution analysis of 2019 novel coronavirus and  
376 coronavirus from other species. Infect Genet Evol 82:104285

377 Li Q, Guan X, Wu P, Wang X, Zhou L, Tong Y, Ren R, Leung KSM, Lau EHY, Wong  
378 JY, Xing X, Xiang N, Wu Y, Li C, Chen Q, Li D, Liu T, Zhao J, Liu M, Tu W, Chen C,

379 Jin L, Yang R, Wang Q, Zhou S, Wang R, Liu H, Luo Y, Liu Y, Shao G, Li H, Tao Z,  
380 Yang Y, Deng Z, Liu B, Ma Z, Zhang Y, Shi G, Lam TTY, Wu JT, Gao GF, Cowling BJ,  
381 Yang B, Leung GM, Feng Z (2020). Early Transmission Dynamics in Wuhan, China, of  
382 Novel Coronavirus-Infected Pneumonia. *N Engl J Med* 382:1199-1207

383 Li X, Giorgi EE, Marichann MH, Foley B, Xiao C, Kong X-P, Chen Y, Korber B, Gao F  
384 (2020). Emergence of SARS-CoV-2 through Recombination and Strong Purifying  
385 Selection. *bioRxiv* 2020.2003.2020.000885

386 Morais Júnior IJ, Polveiro RC, Souza GM, Bortolin DI, Sasaki FT, Lima ATM (2020).  
387 The global population of SARS-CoV-2 is composed of six major subtypes. *bioRxiv*  
388 2020.2004.2014.040782

389 Rambaut A, Holmes EC, Hill V, O'Toole Á, McCrone J, Ruis C, du Plessis L, Pybus OG  
390 (2020). A dynamic nomenclature proposal for SARS-CoV-2 to assist genomic  
391 epidemiology. *bioRxiv* 2020.2004.2017.046086

392 Sagulenko P, Puller V, Neher RA (2018). TreeTime: Maximum-likelihood phylodynamic  
393 analysis. *Virus Evol* 4:vex042

394 Shu Y, McCauley J (2017). GISAID: Global initiative on sharing all influenza data - from  
395 vision to reality. *Euro Surveill* 22:

396 Shu Y, McCauley J (2017). GISAID: Global initiative on sharing all influenza data—from  
397 vision to reality. *Eurosurveillance* 22:

398 Strimmer K, Pybus OG (2001). Exploring the demographic history of DNA sequences  
399 using the generalized skyline plot. *Mol Biol Evol* 18:2298-2305

400 Tang X, Wu C, Li X, Song Y, Yao X, Wu X, Duan Y, Zhang H, Wang Y, Qian Z, Cui J,  
401 Lu J (2020). On the origin and continuing evolution of SARS-CoV-2. *National Science*  
402 *Review*

403 Yu G, Smith DK, Zhu H, Guan Y, Lam TT-Y (2017). ggtree: an r package for  
404 visualization and annotation of phylogenetic trees with their covariates and other  
405 associated data. *Methods in Ecology and Evolution* 8:28-36

406 Zhao Z, Sokhansanj BA, Rosen GL (2020). Characterizing geographical and temporal  
407 dynamics of novel coronavirus SARS-CoV-2 using informative subtype markers.  
408 bioRxiv 2020.2004.2007.030759

409

410 **Table 1 - The genome sequences identified in Turkey.** See the Supplementary Table  
 411 – S1 for the full list. All authors are listed in the acknowledgments in detail. GLAB is  
 412 the Genomic Laboratory that is a conjoint lab of Health Directorate of Istanbul and  
 413 Istanbul Technical University. The genomes are sorted by the sample collection date.

| <b>Accession</b> | <b>Date</b> | <b>City</b> | <b>Lab</b>                | <b>Authors</b>   |
|------------------|-------------|-------------|---------------------------|------------------|
| EPI_ISL_429866   | 3/16/20     | Afyon       | Ministry of Health Turkey | Bayrakdar et al. |
| EPI_ISL_417413   | 3/17/20     | Ankara      | Ministry of Health Turkey | Bayrakdar et al. |
| EPI_ISL_424366   | 3/17/20     | Kayseri     | Erciyes University        | Pavel et al.     |
| EPI_ISL_428712   | 3/17/20     | Karaman     | Ministry of Health Turkey | Bayrakdar et al. |
| EPI_ISL_429867   | 3/17/20     | Balikesir   | Ministry of Health Turkey | Bayrakdar et al. |
| EPI_ISL_429868   | 3/17/20     | Eskisehir   | Ministry of Health Turkey | Bayrakdar et al. |
| EPI_ISL_429869   | 3/17/20     | Konya       | Ministry of Health Turkey | Bayrakdar et al. |
| EPI_ISL_428716   | 3/18/20     | Ankara      | Ministry of Health Turkey | Bayrakdar et al. |
| EPI_ISL_428713   | 3/18/20     | Ankara      | Ministry of Health Turkey | Bayrakdar et al. |
| EPI_ISL_428715   | 3/18/20     | Nevşehir    | Ministry of Health Turkey | Bayrakdar et al. |
| EPI_ISL_428714   | 3/18/20     | Kastamonu   | Ministry of Health Turkey | Bayrakdar et al. |
| EPI_ISL_429865   | 3/18/20     | Çanakkale   | Ministry of Health Turkey | Bayrakdar et al. |
| EPI_ISL_428717   | 3/19/20     | Kocaeli     | Ministry of Health Turkey | Bayrakdar et al. |
| EPI_ISL_428718   | 3/19/20     | Kocaeli     | Ministry of Health Turkey | Bayrakdar et al. |
| EPI_ISL_428719   | 3/21/20     | Siirt       | Ministry of Health Turkey | Bayrakdar et al. |
| EPI_ISL_428720   | 3/21/20     | Ankara      | Ministry of Health Turkey | Bayrakdar et al. |
| EPI_ISL_428721   | 3/21/20     | Ankara      | Ministry of Health Turkey | Bayrakdar et al. |
| EPI_ISL_428722   | 3/22/20     | Balıkesir   | Ministry of Health Turkey | Bayrakdar et al. |
| EPI_ISL_428723   | 3/22/20     | Aksaray     | Ministry of Health Turkey | Bayrakdar et al. |
| EPI_ISL_429870   | 3/22/20     | Sakarya     | Ministry of Health Turkey | Bayrakdar et al. |
| EPI_ISL_429861   | 3/22/20     | Ankara      | Ministry of Health Turkey | Bayrakdar et al. |
| EPI_ISL_429862   | 3/22/20     | Ankara      | Ministry of Health Turkey | Bayrakdar et al. |
| EPI_ISL_429863   | 3/22/20     | Sakarya     | Ministry of Health Turkey | Bayrakdar et al. |
| EPI_ISL_429864   | 3/22/20     | Sakarya     | Ministry of Health Turkey | Bayrakdar et al. |
| EPI_ISL_429871   | 3/23/20     | Ankara      | Ministry of Health Turkey | Bayrakdar et al. |
| EPI_ISL_429873   | 3/23/20     | Kocaeli     | Ministry of Health Turkey | Bayrakdar et al. |
| EPI_ISL_429872   | 3/25/20     | Kocaeli     | Ministry of Health Turkey | Bayrakdar et al. |
| EPI_ISL_427391   | 4/13/20     | İstanbul    | GLAB                      | Karacan et al.   |
| EPI_ISL_428368   | 4/16/20     | İstanbul    | GLAB                      | Karacan et al.   |
| EPI_ISL_428346   | 4/17/20     | İstanbul    | GLAB                      | Karacan et al.   |

414 **Table 2 - Amino acid substitutions observed in 30 samples.** The amino acid  
415 substitutions observed in Turkey are listed. The number of the overall substitutions were  
416 retrieved from CoV-GLUE database. The total number of genomes in the database was  
417 inferred from the D614G substitution which we found to be 63% of all the genomes.  
418 The substitutions that are observed at least in two isolates with enrichment factor greater  
419 than 2 are marked. (nt: nucleotide; aa: amino acid; EF: enrichment factor; sub:  
420 substitution)  
421  
422

| nt pos | nt sub | aa pos | aa sub | ORF   | CoV-GLUE | Turkey (30) | CoV-GLUE fraction | Turkey fraction | EF      |   |
|--------|--------|--------|--------|-------|----------|-------------|-------------------|-----------------|---------|---|
| 881    | G > A  | 206    | A>T    | ORF1a | 2        | 2           | 0.00              | 0.07            | 565.60  | * |
| 884    | C > T  | 207    | R>C    | ORF1a | 52       | 4           | 0.00              | 0.13            | 43.51   | * |
| 944    | G > A  | 227    | G>S    | ORF1a | 1        | 1           | 0.00              | 0.03            | 565.60  |   |
| 1397   | G > A  | 378    | V>I    | ORF1a | 206      | 7           | 0.01              | 0.23            | 19.22   | * |
| 1437   | C > T  | 391    | S>F    | ORF1a | 27       | 1           | 0.00              | 0.03            | 20.95   |   |
| 2997   | C > T  | 911    | S>F    | ORF1a | 1        | 1           | 0.00              | 0.03            | 565.60  |   |
| 3117   | C > T  | 951    | T>I    | ORF1a | 1        | 2           | 0.00              | 0.07            | 1131.19 | * |
| 4524   | C > T  | 1420   | A>V    | ORF1a | 1        | 1           | 0.00              | 0.03            | 565.60  |   |
| 8371   | G > T  | 2702   | Q>H    | ORF1a | 22       | 1           | 0.00              | 0.03            | 25.71   |   |
| 8653   | G > T  | 2796   | M>I    | ORF1a | 55       | 4           | 0.00              | 0.13            | 41.13   | * |
| 11083  | G > T  | 3606   | L>F    | ORF1a | 2222     | 8           | 0.13              | 0.27            | 2.04    | * |
| 12248  | G > T  | 3995   | A>S    | ORF1a | 1        | 1           | 0.00              | 0.03            | 565.60  |   |
| 12741  | C > T  | 4159   | T>I    | ORF1a | 4        | 2           | 0.00              | 0.07            | 282.80  | * |
| 12809  | C > T  | 4182   | L>F    | ORF1a | 3606     | 1           | 0.21              | 0.03            | 0.16    |   |
| 14122  | G > T  | 219    | G>C    | ORF1b | 3        | 1           | 0.00              | 0.03            | 188.53  |   |
| 14408  | C > T  | 314    | P>L    | ORF1b | 10651    | 23          | 0.63              | 0.77            | 1.22    |   |
| 17690  | C > T  | 1408   | S>L    | ORF1b | 36       | 3           | 0.00              | 0.10            | 47.13   | * |
| 21304  | C > A  | 2613   | R>N    | ORF1b | 5        | 1           | 0.00              | 0.03            | 113.12  |   |
| 21305  | G > A  | 2613   | R>N    | ORF1b | 5        | 1           | 0.00              | 0.03            | 113.12  |   |
| 21452  | G > T  | 2662   | G>V    | ORF1b | 2662     | 1           | 0.16              | 0.03            | 0.21    |   |
| 23403  | A > G  | 614    | D>G    | ORF2  | 10691    | 23          | 0.63              | 0.77            | 1.22    |   |
| 23599  | T > A  | 679    | N>K    | ORF2  | 2        | 1           | 0.00              | 0.03            | 282.80  |   |
| 23876  | G > A  | 772    | V>I    | ORF2  | 1        | 1           | 0.00              | 0.03            | 565.60  |   |
| 25275  | C > T  | 1238   | T>I    | ORF2  | 1        | 1           | 0.00              | 0.03            | 565.60  |   |
| 25563  | G > T  | 57     | Q>H    | ORF3  | 4131     | 18          | 0.24              | 0.60            | 2.46    | * |
| 26718  | G > T  | 66     | V>L    | ORF5  | 2        | 2           | 0.00              | 0.07            | 565.60  | * |
| 28054  | C > T  | 54     | S>L    | ORF8  | 1        | 1           | 0.00              | 0.03            | 565.60  |   |
| 28109  | G > T  | 72     | Q>H    | ORF8  | 72       | 2           | 0.00              | 0.07            | 15.71   |   |
| 28854  | C > T  | 194    | S>L    | ORF9  | 220      | 6           | 0.01              | 0.20            | 15.43   | * |
| 28878  | G > A  | 202    | S>N    | ORF9  | 66       | 1           | 0.00              | 0.03            | 8.57    |   |
| 28881  | G > A  | 203    | R>K    | ORF9  | 3113     | 4           | 0.18              | 0.13            | 0.73    |   |
| 28882  | G > A  | 203    | R>K    | ORF9  | 3113     | 4           | 0.18              | 0.13            | 0.73    |   |
| 28883  | G > C  | 204    | G>R    | ORF9  | 3103     | 4           | 0.18              | 0.13            | 0.73    |   |

423

424

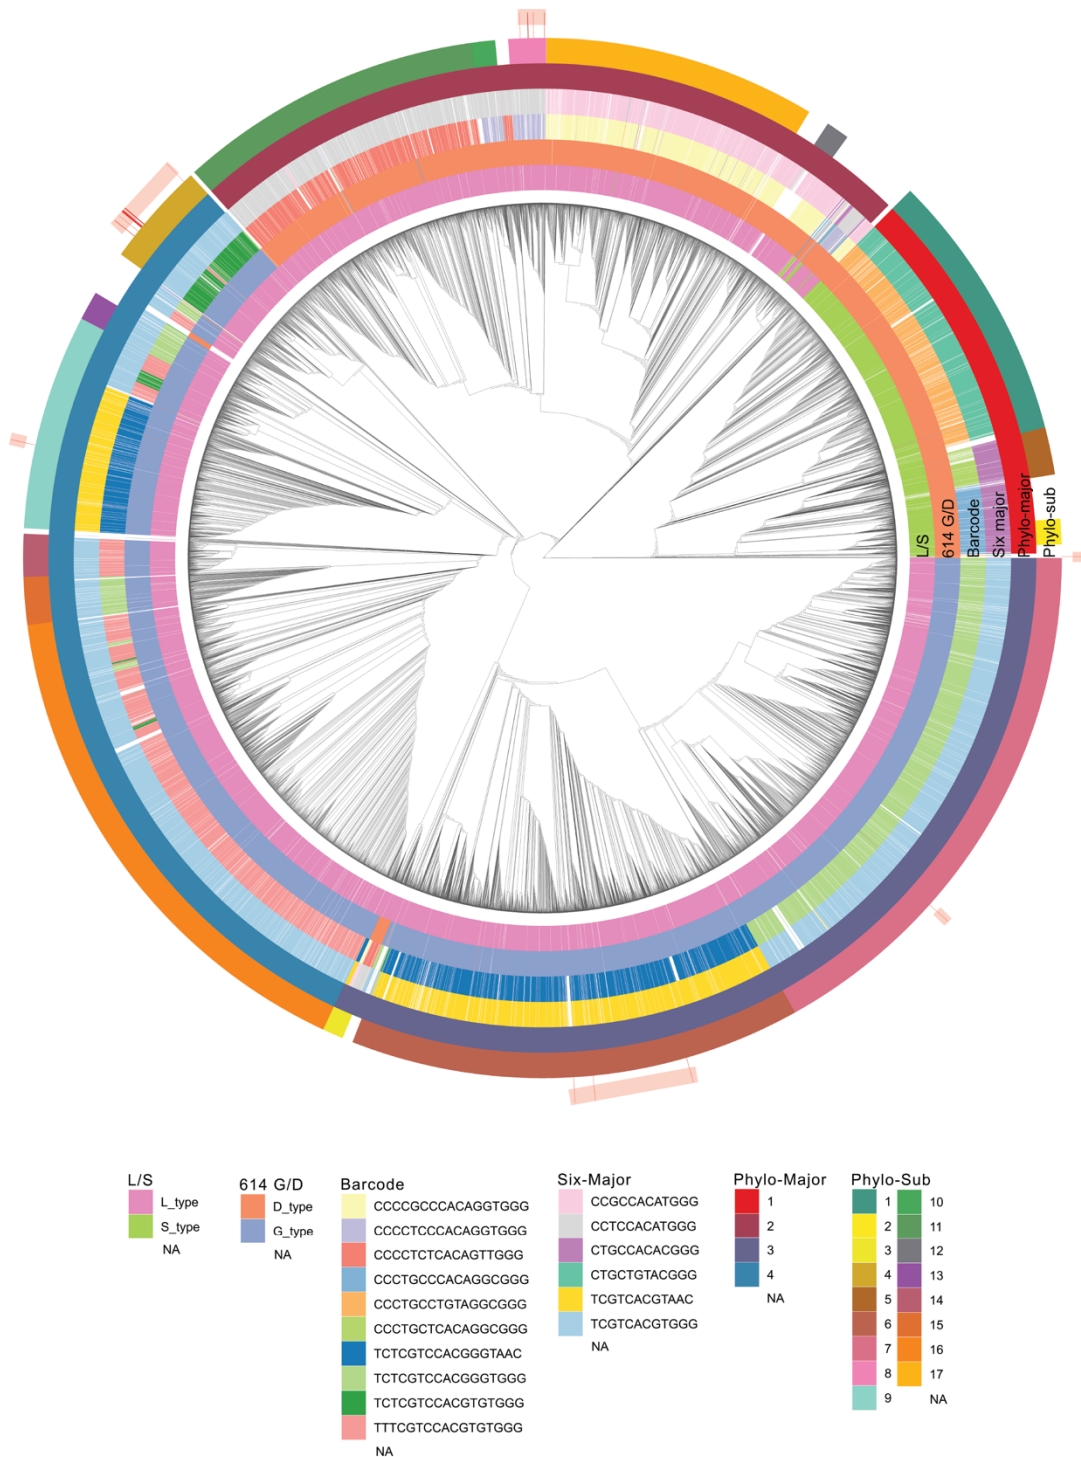

425

426 **Figure 1 - Phylogenetic tree of the 15,277 genomes retrieved from GISAID and their**

427 **groupings.** The time-resolved tree of SARS-CoV-2 appears in the center. Six clustering

428 methods were used to assign 15,277 sequences to the clusters. The clusters are represented

429 as circular layers around the tree. The innermost shell (L/S) represents S and L type  
430 according to 8782th and 28144th positions in the nucleotide. 614 G/D represents the  
431 614th amino acid of the Spike protein. Barcode shows the 10 major subtypes of seventeen  
432 positions in (nucleotide) multiple sequence alignment. Six-major clustering is based on 6  
433 major subtypes of nucleotide combinations in particular positions. The fifth and sixth  
434 layers show Phylo-majors and sub-clusters, respectively. Samples obtained from Turkey  
435 are shown in the outermost shell and they are highlighted.

436

437

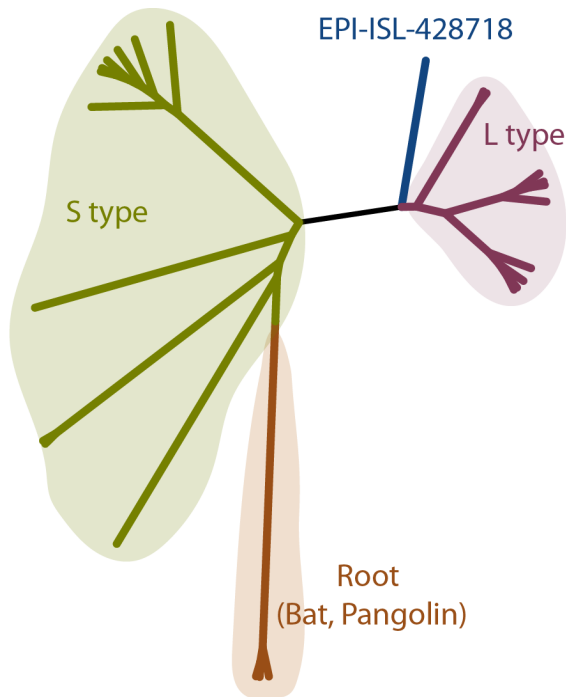

438

439 **Figure 2 - Phylogenetic tree of the transient type (EPI-ISL-428718) from S to L**  
440 **strain.** The maximum likelihood tree was built with IQ-TREE. 10 S-type and 10 L-type  
441 sequences are randomly selected from the assigned samples. The tree was rooted at the  
442 root of the virus genomes obtained from bat and pangolin.

443



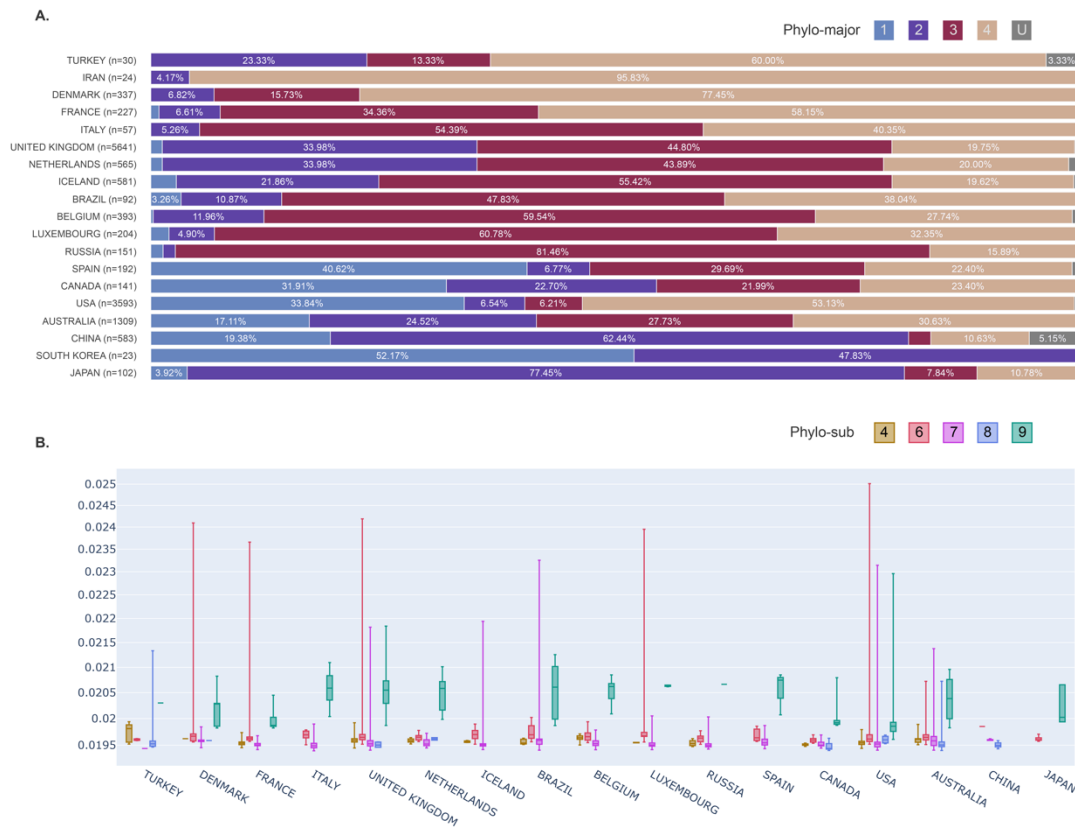

444

445 **Figure 3 - Cluster distribution and sub-cluster divergence.** (A) Percentages of four  
 446 major and unknown clusters across different countries. Unknown (U) samples are the  
 447 ones that cannot be grouped with the generated clusters. (B) Distance distributions of four  
 448 phylo-sub clusters (4,6,7,8 and 9) found in Turkey, across different countries. The y axis  
 449 shows log<sub>10</sub>-scaled root to tip distances.

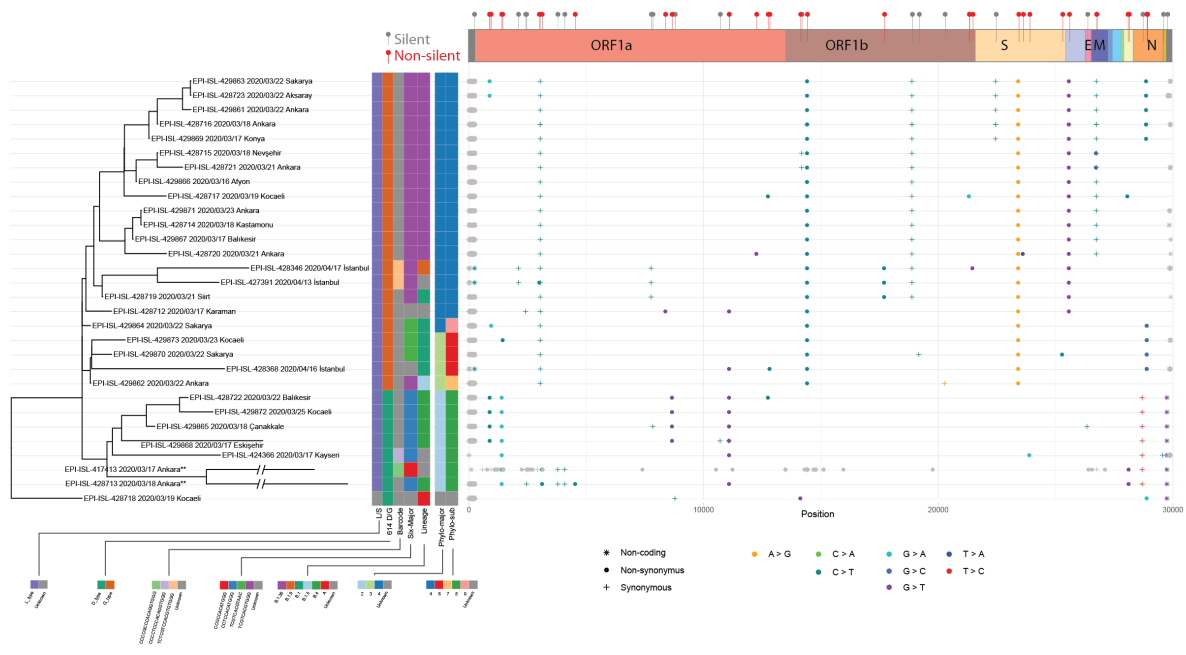

450

451 **Figure 4 - The mutation layout of the 30 samples from Turkey along with the**

452 **phylogenetic tree and clusters.** Phylogenetic tree (left) of SARS-CoV-2 samples

453 sequenced in Turkey. Assigned subtypes of six clustering methods are specified with

454 different colors in the matrix. Dot-plot (Right) of mutations detected in each genome

455 aligned with the corresponding sample. Single nucleotide changes are colored and shaped

456 based on the nucleotide change and synonymy. Gray color indicates that the mutation is

457 either non-informative (ie, due to sequencing errors) or corresponds to a gap .

458 Supplementary bar (top) provides the respective open reading frame information for

459 mutations, and its effect on coding the amino acid. EPI-ISL-417413 had obvious

460 sequencing errors, the mutations of this sampled were manually curated and non-

461 informative ones were treated as ambiguous mutations.

462

463

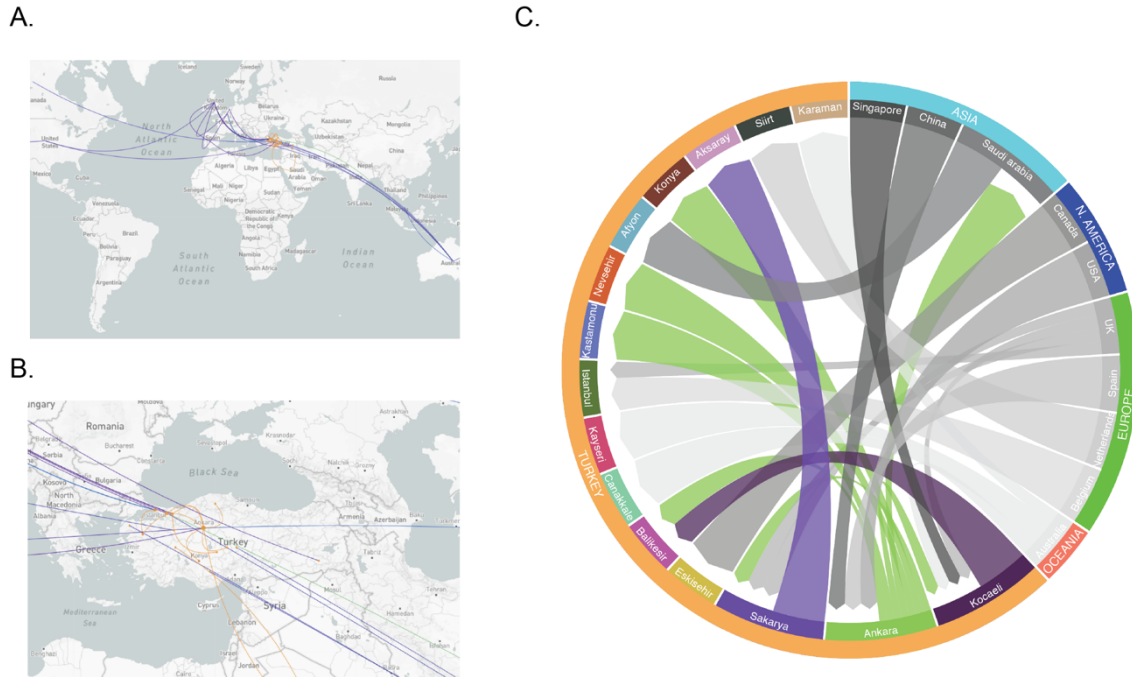

464

465 **Figure 5 - Epidemiological phylogenetic and transmission analysis of the isolates**

466 **collected in Turkey.** Sequences sampled between 2019-03-19 and 2020-04-24 were

467 analyzed with Treetime and tracing between samples visualized in Augur version 6.4.3.

468 (A) Closest (without internal nodes) members filtered and assigned as transmissions were

469 visualized on Leaflet world map using latitude & longitude information of locations. (B)

470 Samples originated from Turkey were implied with orange points and connections while

471 the network of samples originated from other countries demonstrated with blue lines and

472 points. (C) Chord diagram was used as a graphical method to display inter-flow

473 associations between origins and destinations of transmission data.

474

475

476

477

478
